# Supplementary material for: Genome-wide identification of the Gossypium hirsutum CAD gene family and functional study of GhiCAD23 under drought stress
Source: PeerJ journal article supplement (doi:10.7717/peerj.18439), 2024-11-29
Supplement: FigureS1.pdf [file FigureS1.pdf]

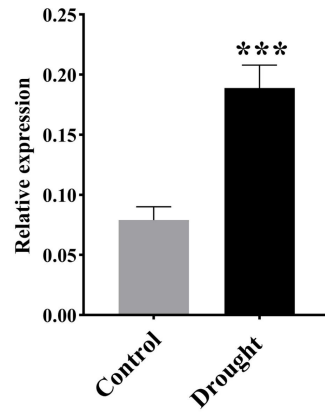

**Figure S1 Expression of *GhiCAD23* in cotton plants under normal watering and drought stress.** SD represents the standard deviation derived from three separate trials. The asterisks indicate significant differences according to the Student's *t*-test (\*\*\*,  $p < 0.001$ ).
