# Supplementary material for: Genome-wide identification of the Gossypium hirsutum CAD gene family and functional study of GhiCAD23 under drought stress
Source: PeerJ journal article supplement (doi:10.7717/peerj.18439), 2024-11-29
Supplement: Raw_Data.xlsx [file Raw_Data.xlsx]

## Sheet: Fig.6,7
Expression levels of GhiCAD23 genes
	GhHIS3 CT	Gene CT	Relation expression			SE
TRV2:00-1	15.81	24.31	0.372759		TRV2:00	0.0606473
TRV2:00-2	17.1	25.64	0.363078		TRV2:GhiCAD23	0.00857972
TRV2:00-3	15.79	24.85	0.257886
TRV2:00-4	17.28	26.34	0.257886
TRV2:00-5	15.96	25.23	0.22461
TRV2:GhiCAD23-1	15.45	26	0.0967641
TRV2:GhiCAD23-2	15.81	26.69	0.0778805
TRV2:GhiCAD23-3	16.07	27.09	0.0710278
TRV2:GhiCAD23-4	15.58	26.42	0.0799571
TRV2:GhiCAD23-5	15.58	26.46	0.0778805
	Leaf RWC (%)			SE
TRV2:00-1	86.2376		TRV2:00	3.83474
TRV2:00-2	84.1744		TRV2:GhiCAD23	5.05784
TRV2:00-3	91.6323
TRV2:00-4	93.5836
TRV2:GhiCAD23-1	56.4373
TRV2:GhiCAD23-2	67.7222
TRV2:GhiCAD23-3	57.6517
	MDA (nM/g)			SE
TRV2:00-1	15.8916		TRV2:00	2.33431
TRV2:00-2	14.1474		TRV2:GhiCAD23	3.15785
TRV2:00-3	19.7353
TRV2:GhiCAD23-1	24.9679
TRV2:GhiCAD23-2	32.6553
TRV2:GhiCAD23-3	28.0687
	SOD (U/g)			SE
TRV2:00-1	402.964		TRV2:00	21.834
TRV2:00-2	398.824		TRV2:GhiCAD23	1.76109
TRV2:00-3	354.716
TRV2:GhiCAD23-1	314.509
TRV2:GhiCAD23-2	317.774
TRV2:GhiCAD23-3	313.701
				SE
	CAT (U/g)
TRV2:00-1	371.558		TRV2:00	8.58703
TRV2:00-2	355.558		TRV2:GhiCAD23	9.52715
TRV2:00-3	375.382
TRV2:GhiCAD23-1	315.343
TRV2:GhiCAD23-2	311.237
TRV2:GhiCAD23-3	333.185
	Lignin content (mg/g FW)			SE
TRV2:00-1	1.16233		TRV2:00	0.0554317
TRV2:00-2	1.03857		TRV2:GhiCAD23	0.0313128
TRV2:00-3	1.05207
TRV2:GhiCAD23-1	0.500393
TRV2:GhiCAD23-2	0.439323
TRV2:GhiCAD23-3	0.429669
	Lignin content (mg/g FW)			SE
Control	0.873303		Control	0.0535874
Control	0.960742		Drought	0.103161
Control	0.83224
Drought	2.66352
Drought	2.41904
Drought	2.59661

## Sheet: Fig. S1
Expression levels of GhiCAD23 genes
	GhHIS3 CT	Gene CT		Relation expression			SE
Control	16.42	27.49	0.0687294	0.0678427		Control	0.010087
Control	16.42	27.49	0.0687294			Drought	0.0171414
Control	16.9	28.03	0.0660693
Control	18.73	29.52	0.082631	0.0900169
Control	19.1	29.64	0.0974028
Control	16.42	27.49	0.0687294	0.0687294
Control	18.73	29.52	0.082631	0.082631
Control	18.96	29.57	0.0930189	0.0930189
Control	20.2	31.2	0.0719686	0.0719686
Drought	18.15	27.52	0.210309	0.210309
Drought	19.01	28.43	0.203503	0.203503
Drought	19.21	28.73	0.190546	0.190546
Drought	19.01	28.65	0.176082	0.176082
Drought	18.91	28.66	0.163789	0.163789
