# Supplementary material for: Genome-wide identification of the Gossypium hirsutum CAD gene family and functional study of GhiCAD23 under drought stress
Source: PeerJ journal article supplement (doi:10.7717/peerj.18439), 2024-11-29
Supplement: TableS1.xlsx [file TableS1.xlsx]

## Sheet: Table S1
Primer sequences
Gene name	Primer sequence (5´-3´)	Application
GhiCAD23-qPCR-F	CCCGAGAAACTAGCACCAGAGC	qPCR
GhiCAD23-qPCR-R	GCCGCATTAGAGCTCACAAGGA	qPCR
GhHIS3-F	TCAAGACTGATTTGCGTTTCCA	qPCR Reference gene
GhHIS3-R	GCGCAAAGGTTGGTGTCTTC	qPCR Reference gene
GhiCAD23-F	CCCGAATTCTCCCTTGAAGCAGTTC	Vector construction
GhiCAD23-R	CCTCTCGAGCATGCTTCCTATGAAACTC	Vector construction
