# Supplementary material for: Genome-wide identification of the Gossypium hirsutum CAD gene family and functional study of GhiCAD23 under drought stress
Source: PeerJ journal article supplement (doi:10.7717/peerj.18439), 2024-11-29
Supplement: TableS2.xlsx [file TableS2.xlsx]

## Sheet: Table S2
The basic information of CAD family genes in Gossypium hirsutum
Name	Sequence ID	Number of Amino Acid	Molecular Weight (Da)	pI	Chromosomal location	Subcelluar localization
GhiCAD1	Ghi_A02G08071	359	39068.9	5.71	98612341 - 98615217	Cytoplasm
GhiCAD2	Ghi_A02G08541	362	39332.4	6.12	101667224 - 101669902	Cytoplasm
GhiCAD3	Ghi_A02G08551	164	18251.3	5.9	101741481 - 101742198	Cytoplasm-Nucleus
GhiCAD4	Ghi_A03G12126	358	38785.5	5.34	113606486 - 113608215	Cytoplasm
GhiCAD5	Ghi_A05G11441	359	39054	6.41	22381194 - 22383588	Peroxisome
GhiCAD6	Ghi_A11G11916	180	19687.8	6.43	58737000 - 58742155	Cytoplasm
GhiCAD7	Ghi_A11G11921	378	40756.8	5.66	58767183 - 58776674	Cytoskeleton
GhiCAD8	Ghi_A11G11926	361	39065.3	7.61	59180843 - 59182314	Cytoplasm
GhiCAD9	Ghi_A11G12711	309	33111.7	6.59	68324687 - 68326085	Chloroplast
GhiCAD10	Ghi_A12G01121	357	38798.7	5.32	3139053 - 3140621	Cytoplasm
GhiCAD11	Ghi_A12G05356	361	39240.4	6.6	55702556 - 55704070	Cytoplasm
GhiCAD12	Ghi_A12G05361	293	31656.7	6.54	55722492 - 55723851	Cytoplasm
GhiCAD13	Ghi_A12G05366	355	38515.7	6.86	55807777 - 55809311	Cytoplasm
GhiCAD14	Ghi_A12G05371	251	27312.6	8.48	56137349 - 56138829	Cytoplasm
GhiCAD15	Ghi_A12G05381	248	26673.3	5.56	56184946 - 56185864	Chloroplast
GhiCAD16	Ghi_A12G14111	355	38383.2	7.05	108438121 - 108439810	Cytoskeleton
GhiCAD17	Ghi_D02G11581	118	12693.4	5.86	69133201 - 69133751	Chloroplast
GhiCAD18	Ghi_D02G11586	243	26628.1	5.82	69133809 - 69134896	Cytoplasm
GhiCAD19	Ghi_D03G01731	361	39191.4	6.12	3840954 - 3843630	Cytoplasm
GhiCAD20	Ghi_D03G01741	323	34962.5	6.71	3892780 - 3895466	Cytoplasm
GhiCAD21	Ghi_D03G02966	359	39085.9	5.85	14447570 - 14450468	Cytoplasm
GhiCAD22	Ghi_D05G06611	359	39179.2	7.13	11762384 - 11764883	Peroxisome
GhiCAD23	Ghi_D11G10696	352	38192.9	6.01	27146892 - 27148340	Chloroplast
GhiCAD24	Ghi_D11G11431	364	39136.9	5.85	31919368 - 31923629	Cytoplasm
GhiCAD25	Ghi_D12G01121	357	38706.6	5.41	2782223 - 2783801	Cytoplasm
GhiCAD26	Ghi_D12G06106	345	37101.8	7.65	31928620 - 31931709	Cytoplasm
GhiCAD27	Ghi_D12G06116	182	19912.1	7.65	32016149 - 32016797	Cytoplasm
GhiCAD28	Ghi_D12G06121	362	38990	6.46	32019351 - 32020810	Cytoplasm
GhiCAD29	Ghi_D12G14641	403	44025.9	8.22	65733716 - 65735552	Nucleus
