# Supplementary material for: Genome-wide identification of the Gossypium hirsutum CAD gene family and functional study of GhiCAD23 under drought stress
Source: PeerJ journal article supplement (doi:10.7717/peerj.18439), 2024-11-29
Supplement: TableS3.xlsx [file TableS3.xlsx]

## Sheet: Table S3
Analysis of cis-acting elements on CAD gene promoters in Gossypium hirsutum
Gene ID	Starting position	End position	Cis-acting element name
GhiCAD1	54	60	ARE
GhiCAD1	58	64	MYB
GhiCAD1	70	79	circadian
GhiCAD1	111	120	WUN-motif
GhiCAD1	187	193	MYC
GhiCAD1	191	196	TGACG-motif
GhiCAD1	208	217	TCA-element
GhiCAD1	235	241	ARE
GhiCAD1	296	302	Myb
GhiCAD1	296	302	MBS
GhiCAD1	400	408	TATA
GhiCAD1	421	427	MYC
GhiCAD1	468	478	GATA-motif
GhiCAD1	509	517	CARE
GhiCAD1	674	680	AT~TATA-box
GhiCAD1	782	788	AT~TATA-box
GhiCAD1	970	978	TATA
GhiCAD1	1031	1039	TATA
GhiCAD1	1094	1099	TGACG-motif
GhiCAD1	1104	1110	MYC
GhiCAD1	1230	1237	TATC-box
GhiCAD1	1497	1506	WUN-motif
GhiCAD1	1695	1703	TATA
GhiCAD1	1741	1747	MYC
GhiCAD1	1933	1939	AT~TATA-box
GhiCAD1	1956	1962	ARE
GhiCAD1	1975	1981	MYB
GhiCAD2	213	219	MYB
GhiCAD2	283	289	MYB
GhiCAD2	458	464	MYC
GhiCAD2	500	506	MYC
GhiCAD2	634	642	TATA
GhiCAD2	800	807	GATA-motif
GhiCAD2	868	874	MYC
GhiCAD2	957	963	MYC
GhiCAD2	993	999	MYC
GhiCAD2	1126	1134	TATA
GhiCAD2	1136	1145	GATA-motif
GhiCAD2	1174	1180	MYC
GhiCAD2	1325	1331	MYB
GhiCAD2	1339	1349.5	G-box
GhiCAD2	1344	1350	MYC
GhiCAD2	1375	1380	TGACG-motif
GhiCAD2	1404	1410	MYB
GhiCAD2	1440	1445	TGACG-motif
GhiCAD2	1529	1537	TATA
GhiCAD2	1812	1818	MYB
GhiCAD2	1858	1866	TATA
GhiCAD2	1784	1793	circadian
GhiCAD2	1938	1945	AAGAA-motif
GhiCAD2	1942	1949	AAGAA-motif
GhiCAD3	58	64	G-Box
GhiCAD3	59	64	ABRE
GhiCAD3	73	79	MYC
GhiCAD3	119	125	DRE core
GhiCAD3	165	171	MYB
GhiCAD3	245	252	DRE1
GhiCAD3	474	481	AAGAA-motif
GhiCAD3	648	654	MYC
GhiCAD3	675	681	MYB
GhiCAD3	807	813	MYC
GhiCAD3	850	856	ARE
GhiCAD3	900	906	Myb
GhiCAD3	900	906	MBS
GhiCAD3	904	910	MYB
GhiCAD3	1104	1110	MYC
GhiCAD3	1158	1163	ABRE
GhiCAD3	1158	1164	G-box
GhiCAD3	1160	1165	TGACG-motif
GhiCAD3	1173	1179	Myc
GhiCAD3	1182	1188	MYB
GhiCAD3	1586	1592	MYB
GhiCAD3	1682	1688	MYB
GhiCAD3	1707	1713	MYC
GhiCAD3	1735	1742	TATC-box
GhiCAD3	1787	1793	MYC
GhiCAD3	1935	1941	ARE
GhiCAD4	114	119	TGACG-motif
GhiCAD4	194	200	ARE
GhiCAD4	275	280	TGACG-motif
GhiCAD4	416	423	TATC-box
GhiCAD4	448	454	ARE
GhiCAD4	866	872	ARE
GhiCAD4	998	1006	CARE
GhiCAD4	1019	1025	MYC
GhiCAD4	1054	1060	MYB
GhiCAD4	1178	1189	MBSI
GhiCAD4	1184	1190	MYB
GhiCAD4	1191	1197	ARE
GhiCAD4	1233	1244	MBSI
GhiCAD4	1233	1239	MYB
GhiCAD4	1414	1420	ARE
GhiCAD4	1723	1733	G-Box
GhiCAD4	1726	1732	MYC
GhiCAD4	1795	1801	MYB
GhiCAD5	28	34	ARE
GhiCAD5	152	158	Myb
GhiCAD5	241	246	TGACG-motif
GhiCAD5	271	277	MYB
GhiCAD5	352	358	Myb
GhiCAD5	422	428	AT~TATA-box
GhiCAD5	424	432	TATA
GhiCAD5	556	562	ARE
GhiCAD5	560	565	ABRE
GhiCAD5	560	566	G-box
GhiCAD5	755	760	TGACG-motif
GhiCAD5	1009	1015	MYB
GhiCAD5	1104	1110	ARE
GhiCAD5	1185	1194	circadian
GhiCAD5	1207	1216	WUN-motif
GhiCAD5	1213	1221	AT~TATA-box
GhiCAD5	1215	1221	AT~TATA-box
GhiCAD5	1412	1420	AT~TATA-box
GhiCAD5	1414	1420	AT~TATA-box
GhiCAD5	1446	1451	TGACG-motif
GhiCAD5	1449	1454	TGACG-motif
GhiCAD5	1471	1479	AT~TATA-box
GhiCAD5	1473	1479	AT~TATA-box
GhiCAD5	1604	1610	MYB
GhiCAD5	1658	1667	TCA-element
GhiCAD5	1757	1766	GATA-motif
GhiCAD5	1765	1774	AAGAA-motif
GhiCAD5	1766	1773	AAGAA-motif
GhiCAD5	1825	1831	MYC
GhiCAD6	96	104	TATA
GhiCAD6	189	196	DRE1
GhiCAD6	249	255	Myb
GhiCAD6	669	675	G-Box
GhiCAD6	669	675	ABRE
GhiCAD6	669	675	G-box
GhiCAD6	670	675	ABRE
GhiCAD6	713	721	TATA
GhiCAD6	732	738	AT~TATA-box
GhiCAD6	759	765	MYB
GhiCAD6	782	791	WUN-motif
GhiCAD6	783	791	WUN-motif
GhiCAD6	877	883	MYC
GhiCAD6	1028	1034	MYB
GhiCAD6	1036	1042	ARE
GhiCAD6	1043	1049	MYC
GhiCAD6	1393	1399	Myb
GhiCAD6	1393	1399	MBS
GhiCAD6	1529	1539	GATA-motif
GhiCAD6	1626	1631	ABRE
GhiCAD6	1626	1632	G-box
GhiCAD6	1628	1633	TGACG-motif
GhiCAD6	1713	1719	AT~TATA-box
GhiCAD6	1715	1721	AT~TATA-box
GhiCAD6	1989	1995	MYC
GhiCAD7	45	53	AT~TATA-box
GhiCAD7	47	53	AT~TATA-box
GhiCAD7	49	55	AT~TATA-box
GhiCAD7	51	59	TATA
GhiCAD7	237	245	AT~TATA-box
GhiCAD7	239	245	AT~TATA-box
GhiCAD7	681	687	ARE
GhiCAD7	691	697	MYC
GhiCAD7	846	854	TATA
GhiCAD7	904	910	MYC
GhiCAD7	937	945	TATA
GhiCAD7	1118	1127	AAGAA-motif
GhiCAD7	1157	1163	ARE
GhiCAD7	1209	1217	TATA
GhiCAD7	1331	1337	ARE
GhiCAD7	1465	1474	WUN-motif
GhiCAD7	1528	1534	G-box
GhiCAD7	1528	1533	ABRE
GhiCAD7	1651	1659	TATA
GhiCAD7	1653	1661	AT~TATA-box
GhiCAD7	1655	1661	AT~TATA-box
GhiCAD7	1694	1700	MYB
GhiCAD7	1794	1800	AT~TATA-box
GhiCAD7	1801	1809	TATA
GhiCAD7	1901	1907	MYC
GhiCAD7	1968	1973	TGACG-motif
GhiCAD7	1972	1978	ARE
GhiCAD8	24	30	AT~TATA-box
GhiCAD8	210	215	TGACG-motif
GhiCAD8	382	391	WUN-motif
GhiCAD8	508	514	MYB
GhiCAD8	523	529	MYC
GhiCAD8	930	936	AT~TATA-box
GhiCAD8	932	938	AT~TATA-box
GhiCAD8	986	992	MYC
GhiCAD8	1049	1058	ABRE
GhiCAD8	1051	1057	G-Box
GhiCAD8	1051	1056	ABRE
GhiCAD8	1058	1064	MYC
GhiCAD8	1265	1271	G-Box
GhiCAD8	1266	1271	ABRE
GhiCAD8	1370	1376	G-box
GhiCAD8	1371	1376	ABRE
GhiCAD8	1564	1571	AAGAA-motif
GhiCAD8	1657	1663	MYB
GhiCAD8	1844	1850	Myb
GhiCAD8	1948	1954	MYC
GhiCAD8	1990	1996	G-box
GhiCAD8	1990	1995	ABRE
GhiCAD9	214	222	TATA
GhiCAD9	307	313	DRE core
GhiCAD9	409	414	ABRE
GhiCAD9	409	415	G-box
GhiCAD9	443	450	Myc
GhiCAD9	737	742	TGACG-motif
GhiCAD9	847	853	MYB
GhiCAD9	1003	1009	Myb
GhiCAD9	1003	1009	MBS
GhiCAD9	1107	1113	MYB
GhiCAD9	1151	1157	ARE
GhiCAD9	1164	1171	AAGAA-motif
GhiCAD9	1286	1293	Myc
GhiCAD9	1317	1323	CCAAT-box
GhiCAD9	1340	1346	CCAAT-box
GhiCAD9	1384	1392	TATA
GhiCAD9	1389	1399	GATA-motif
GhiCAD9	1435	1443	TATA
GhiCAD9	1492	1498	CCAAT-box
GhiCAD9	1514	1520	MYC
GhiCAD9	1557	1563	MYB
GhiCAD9	1604	1613	GATA-motif
GhiCAD9	1664	1669	TGACG-motif
GhiCAD9	1702	1707	TGACG-motif
GhiCAD9	1705	1711	MYC
GhiCAD9	1718	1724	MYB
GhiCAD9	1864	1870	MYB
GhiCAD9	1876	1881	TGACG-motif
GhiCAD10	65	71	MYB
GhiCAD10	117	123	MYC
GhiCAD10	173	179	MYB
GhiCAD10	229	238	circadian
GhiCAD10	329	342	4cl-CMA1c
GhiCAD10	329	341	AC-II
GhiCAD10	377	383	MYC
GhiCAD10	414	421	GATA-motif
GhiCAD10	621	627	ARE
GhiCAD10	740	746	MYC
GhiCAD10	744	750	ARE
GhiCAD10	948	954	G-Box
GhiCAD10	949	954	ABRE
GhiCAD10	1021	1027	AT~TATA-box
GhiCAD10	1426	1434	AT~TATA-box
GhiCAD10	1428	1434	AT~TATA-box
GhiCAD10	1430	1436	AT~TATA-box
GhiCAD10	1432	1438	AT~TATA-box
GhiCAD10	1544	1550	ARE
GhiCAD10	1569	1575	G-box
GhiCAD10	1570	1575	ABRE
GhiCAD10	1618	1624	ARE
GhiCAD10	1662	1668	MYC
GhiCAD10	1670	1675	TGACG-motif
GhiCAD10	1720	1726	MYC
GhiCAD10	1819	1828	ABRE
GhiCAD10	1821	1827	G-Box
GhiCAD10	1821	1826	ABRE
GhiCAD10	1857	1863	MYC
GhiCAD10	1870	1876	Myb
GhiCAD10	1870	1876	MBS
GhiCAD10	1891	1897	AT~TATA-box
GhiCAD10	1893	1899	AT~TATA-box
GhiCAD10	1895	1901	AT~TATA-box
GhiCAD10	1897	1903	AT~TATA-box
GhiCAD10	1903	1909	MYC
GhiCAD10	1909	1915	MYB
GhiCAD10	1917	1923	MYB
GhiCAD11	174	180	ARE
GhiCAD11	240	248	ATC-motif
GhiCAD11	301	308	AAGAA-motif
GhiCAD11	435	442	DRE1
GhiCAD11	479	484	TGACG-motif
GhiCAD11	502	508	MYC
GhiCAD11	513	518	TGACG-motif
GhiCAD11	536	542	ARE
GhiCAD11	987	993	AT~TATA-box
GhiCAD11	989	995	AT~TATA-box
GhiCAD11	1063	1069	AT~TATA-box
GhiCAD11	1065	1071	AT~TATA-box
GhiCAD11	1080	1086	AT~TATA-box
GhiCAD11	1146	1153	DRE1
GhiCAD11	1267	1273	MYC
GhiCAD11	1287	1294	AAGAA-motif
GhiCAD11	1350	1358	AT~TATA-box
GhiCAD11	1352	1358	AT~TATA-box
GhiCAD11	1354	1360	AT~TATA-box
GhiCAD11	1588	1594	AT~TATA-box
GhiCAD11	1595	1604	WUN-motif
GhiCAD11	1772	1778	MYC
GhiCAD11	1794	1800	ARE
GhiCAD11	1819	1825	MYB
GhiCAD11	1868	1873	TGACG-motif
GhiCAD11	1901	1907	MYB
GhiCAD11	1947	1953	MYC
GhiCAD12	54	65	AC-II
GhiCAD12	93	104	AC-II
GhiCAD12	227	235	TATA
GhiCAD12	229	235	AT~TATA-box
GhiCAD12	231	237	AT~TATA-box
GhiCAD12	266	274	AT~TATA-box
GhiCAD12	268	274	AT~TATA-box
GhiCAD12	310	318	AT~TATA-box
GhiCAD12	312	318	AT~TATA-box
GhiCAD12	314	320	AT~TATA-box
GhiCAD12	454	460	Myb
GhiCAD12	474	480	MYC
GhiCAD12	520	526	MYC
GhiCAD12	799	807	WUN-motif
GhiCAD12	898	904	MYB
GhiCAD12	933	939	AT~TATA-box
GhiCAD12	960	966	AT~TATA-box
GhiCAD12	1038	1044	ARE
GhiCAD12	1091	1096	TGACG-motif
GhiCAD12	1429	1437	TATA
GhiCAD12	1603	1608	TGACG-motif
GhiCAD12	1701	1706	TGACG-motif
GhiCAD12	1769	1775	MYC
GhiCAD12	1980	1985	TGACG-motif
GhiCAD12	1981	1987	G-box
GhiCAD12	1982	1987	ABRE
GhiCAD13	125	131	MYB
GhiCAD13	235	241	Myb
GhiCAD13	420	428	TATA
GhiCAD13	422	430	AT~TATA-box
GhiCAD13	424	430	AT~TATA-box
GhiCAD13	437	445	TATA
GhiCAD13	439	447	AT~TATA-box
GhiCAD13	441	447	AT~TATA-box
GhiCAD13	476	484	AT~TATA-box
GhiCAD13	478	484	AT~TATA-box
GhiCAD13	520	528	AT~TATA-box
GhiCAD13	522	528	AT~TATA-box
GhiCAD13	524	530	AT~TATA-box
GhiCAD13	567	573	MYC
GhiCAD13	663	669	Myb
GhiCAD13	727	733	G-Box
GhiCAD13	728	733	ABRE
GhiCAD13	911	919	TATA
GhiCAD13	1007	1015	WUN-motif
GhiCAD13	1106	1112	MYB
GhiCAD13	1141	1147	AT~TATA-box
GhiCAD13	1168	1174	AT~TATA-box
GhiCAD13	1246	1252	ARE
GhiCAD13	1299	1304	TGACG-motif
GhiCAD13	1407	1415	WUN-motif
GhiCAD13	1467	1473	MYB
GhiCAD13	1635	1643	TATA
GhiCAD13	1809	1814	TGACG-motif
GhiCAD13	1907	1912	TGACG-motif
GhiCAD14	151	159	TATA
GhiCAD14	253	259	ARE
GhiCAD14	310	315	TGACG-motif
GhiCAD14	432	437	TGACG-motif
GhiCAD14	559	566	AAGAA-motif
GhiCAD14	655	662	AAGAA-motif
GhiCAD14	704	710	ARE
GhiCAD14	776	782	MYB
GhiCAD14	905	913	TATA
GhiCAD14	986	992	MYB
GhiCAD14	1105	1113	TATA
GhiCAD14	1223	1229	MYB
GhiCAD14	1236	1242	MYC
GhiCAD14	1506	1514	TATA
GhiCAD14	1888	1897	TCA-element
GhiCAD14	1913	1919	MYB
GhiCAD14	1944	1950	MYC
GhiCAD15	2	8	Myb
GhiCAD15	104	110	Myb
GhiCAD15	104	110	MBS
GhiCAD15	162	168	G-box
GhiCAD15	162	167	ABRE
GhiCAD15	205	212	AAGAA-motif
GhiCAD15	225	232	TATC-box
GhiCAD15	380	386	MYB
GhiCAD15	446	455	GATA-motif
GhiCAD15	628	635	AAGAA-motif
GhiCAD15	643	649	Myb
GhiCAD15	741	747	MYB
GhiCAD15	804	810	Myb
GhiCAD15	914	923	WUN-motif
GhiCAD15	1007	1013	MYC
GhiCAD15	1014	1020	Myb
GhiCAD15	1014	1020	MBS
GhiCAD15	1056	1062	ARE
GhiCAD15	1148	1157	circadian
GhiCAD15	1172	1178	MYC
GhiCAD15	1178	1184	MYC
GhiCAD15	1195	1201	MYC
GhiCAD15	1295	1301	MYB
GhiCAD15	1433	1440	Myc
GhiCAD15	1477	1486	WUN-motif
GhiCAD15	1478	1486	WUN-motif
GhiCAD15	1526	1533	AAGAA-motif
GhiCAD15	1544	1551	AAGAA-motif
GhiCAD15	1689	1696	Myc
GhiCAD15	1703	1709	MYB
GhiCAD15	1707	1714	TATC-box
GhiCAD15	1769	1775	MYC
GhiCAD15	1803	1810	TATC-box
GhiCAD15	1882	1888	MYB
GhiCAD16	26	33	TATC-box
GhiCAD16	39	47	TATA
GhiCAD16	74	80	MYB
GhiCAD16	79	88	WUN-motif
GhiCAD16	101	108	AAGAA-motif
GhiCAD16	123	130	Myc
GhiCAD16	231	238	GATA-motif
GhiCAD16	350	356	MYB
GhiCAD16	475	483	TATA
GhiCAD16	477	485	AT~TATA-box
GhiCAD16	479	485	AT~TATA-box
GhiCAD16	535	541	MYC
GhiCAD16	590	596	MYC
GhiCAD16	744	752	AT~TATA-box
GhiCAD16	746	752	AT~TATA-box
GhiCAD16	906	912	G-box
GhiCAD16	907	912	ABRE
GhiCAD16	1172	1178	ARE
GhiCAD16	1230	1238	AT~TATA-box
GhiCAD16	1232	1238	AT~TATA-box
GhiCAD16	1234	1240	AT~TATA-box
GhiCAD16	1314	1320	AT~TATA-box
GhiCAD16	1322	1328	AT~TATA-box
GhiCAD16	1352	1360	AT~TATA-box
GhiCAD16	1354	1360	AT~TATA-box
GhiCAD16	1376	1382	MYB
GhiCAD16	1398	1404	MYC
GhiCAD16	1456	1462	AT~TATA-box
GhiCAD16	1501	1507	AT~TATA-box
GhiCAD16	1506	1514	TATA
GhiCAD16	1544	1550	AT~TATA-box
GhiCAD16	1766	1772	ARE
GhiCAD16	1868	1874	ARE
GhiCAD17	107	113	ARE
GhiCAD17	177	183	AT~TATA-box
GhiCAD17	209	217	TATA
GhiCAD17	294	299	ABRE
GhiCAD17	294	300	G-box
GhiCAD17	409	415	MYB
GhiCAD17	542	551	ABRE
GhiCAD17	544	550	G-Box
GhiCAD17	544	550	ABRE
GhiCAD17	544	550	G-box
GhiCAD17	545	550	ABRE
GhiCAD17	801	807	ARE
GhiCAD17	902	908	MYC
GhiCAD17	937	943	MYB
GhiCAD17	999	1005	MYC
GhiCAD17	1207	1216	WUN-motif
GhiCAD17	1208	1216	WUN-motif
GhiCAD17	1258	1264	ARE
GhiCAD17	1480	1486	AT~TATA-box
GhiCAD17	1652	1658	MYB
GhiCAD18	193	199	ARE
GhiCAD18	294	300	MYC
GhiCAD18	329	335	MYB
GhiCAD18	391	397	MYC
GhiCAD18	599	608	WUN-motif
GhiCAD18	600	608	WUN-motif
GhiCAD18	650	656	ARE
GhiCAD18	872	878	AT~TATA-box
GhiCAD18	1044	1050	MYB
GhiCAD18	1421	1427	Myb
GhiCAD18	1421	1427	MBS
GhiCAD18	1462	1471	GATA-motif
GhiCAD18	1474	1481	Myc
GhiCAD18	1498	1504	ARE
GhiCAD18	1537	1543	ARE
GhiCAD18	1558	1564	MYC
GhiCAD18	1564	1570	AT~TATA-box
GhiCAD18	1588	1597	TCA-element
GhiCAD18	1745	1751	MYB
GhiCAD18	1773	1779	ARE
GhiCAD18	1798	1804	MYB
GhiCAD18	1857	1863	DRE core
GhiCAD19	136	145	ABRE
GhiCAD19	185	191	G-box
GhiCAD19	194	200	MYC
GhiCAD19	273	279	G-box
GhiCAD19	291	297	MYC
GhiCAD19	356	362	G-box
GhiCAD19	392	401	ABRE
GhiCAD19	424	430	G-box
GhiCAD19	469	478	TCA-element
GhiCAD19	501	507	Myb
GhiCAD19	501	507	MBS
GhiCAD19	567	573	G-box
GhiCAD19	568	573	ABRE
GhiCAD19	579	585	MYB
GhiCAD19	622	628	MYC
GhiCAD19	821	827	MYB
GhiCAD19	859	864	TGACG-motif
GhiCAD19	866	872	MYB
GhiCAD19	1032	1039	Myc
GhiCAD19	1081	1088	AAGAA-motif
GhiCAD19	1098	1107	WUN-motif
GhiCAD19	1224	1230	MYC
GhiCAD19	1240	1246	MYC
GhiCAD19	1323	1333.5	MBSI
GhiCAD19	1364	1370	ARE
GhiCAD19	1369	1375	ARE
GhiCAD19	1501	1507	MYC
GhiCAD19	1553	1559	ARE
GhiCAD19	1561	1567	ARE
GhiCAD19	1667	1673	CCAAT-box
GhiCAD19	1855	1863	TATA
GhiCAD19	1935	1942	AAGAA-motif
GhiCAD19	1939	1946	AAGAA-motif
GhiCAD20	244	250	MYB
GhiCAD20	387	393	MYB
GhiCAD20	448	454	MYC
GhiCAD20	546	552	MYB
GhiCAD20	582	590	TATA
GhiCAD20	748	755	GATA-motif
GhiCAD20	799	806	GATA-motif
GhiCAD20	872	878	MYB
GhiCAD20	1089	1097	TATA
GhiCAD20	1137	1143	MYC
GhiCAD20	1186	1195	AAGAA-motif
GhiCAD20	1287	1293	MYB
GhiCAD20	1307	1313	MYC
GhiCAD20	1337	1342	TGACG-motif
GhiCAD20	1366	1372	MYB
GhiCAD20	1402	1407	TGACG-motif
GhiCAD20	1409	1415	ABRE
GhiCAD20	1409	1415	G-box
GhiCAD20	1409	1415	G-Box
GhiCAD20	1410	1415	ABRE
GhiCAD20	1505	1511	AT~TATA-box
GhiCAD20	1507	1513	AT~TATA-box
GhiCAD20	1517	1523	MYB
GhiCAD20	1667	1673	CCAAT-box
GhiCAD20	1781	1790	circadian
GhiCAD20	1855	1863	TATA
GhiCAD20	1915	1923	TATA
GhiCAD20	1935	1942	AAGAA-motif
GhiCAD20	1939	1946	AAGAA-motif
GhiCAD21	289	295	MYB
GhiCAD21	467	474	AAGAA-motif
GhiCAD21	471	478	AAGAA-motif
GhiCAD21	489	496	AAGAA-motif
GhiCAD21	492	501	AAGAA-motif
GhiCAD21	493	500	AAGAA-motif
GhiCAD21	593	599	AT~TATA-box
GhiCAD21	595	601	AT~TATA-box
GhiCAD21	688	694	MYC
GhiCAD21	793	801	WUN-motif
GhiCAD21	815	821	MYC
GhiCAD21	838	844	MYC
GhiCAD21	861	867	MYC
GhiCAD21	874	882	AT~TATA-box
GhiCAD21	876	882	AT~TATA-box
GhiCAD21	878	884	AT~TATA-box
GhiCAD21	880	886	AT~TATA-box
GhiCAD21	1147	1153	ARE
GhiCAD21	1259	1265	Myb
GhiCAD21	1382	1390	G-box
GhiCAD21	1383	1388	ABRE
GhiCAD21	1383	1389	G-box
GhiCAD21	1678	1684	AT~TATA-box
GhiCAD21	1752	1758	MYC
GhiCAD21	1933	1939	AT~TATA-box
GhiCAD21	1956	1962	ARE
GhiCAD22	70	76	ARE
GhiCAD22	205	211	Myb
GhiCAD22	312	318	MYB
GhiCAD22	379	385	AT~TATA-box
GhiCAD22	411	417	Myb
GhiCAD22	478	484	AT~TATA-box
GhiCAD22	480	488	TATA
GhiCAD22	528	534	AT~TATA-box
GhiCAD22	801	806	TGACG-motif
GhiCAD22	862	869	Myc
GhiCAD22	906	914	TATA
GhiCAD22	1083	1089	ARE
GhiCAD22	1163	1172	circadian
GhiCAD22	1189	1197	TATA
GhiCAD22	1191	1199	AT~TATA-box
GhiCAD22	1193	1199	AT~TATA-box
GhiCAD22	1394	1402	TATA
GhiCAD22	1396	1404	AT~TATA-box
GhiCAD22	1398	1404	AT~TATA-box
GhiCAD22	1424	1429	TGACG-motif
GhiCAD22	1436	1441	TGACG-motif
GhiCAD22	1439	1444	TGACG-motif
GhiCAD22	1467	1473	AT~TATA-box
GhiCAD22	1563	1568	TGACG-motif
GhiCAD22	1614	1620	ARE
GhiCAD22	1697	1706	TCA-element
GhiCAD22	1861	1867	MYC
GhiCAD22	1898	1903	TGACG-motif
GhiCAD23	173	181	TATA
GhiCAD23	177	185	TATA
GhiCAD23	193	201	AT~TATA-box
GhiCAD23	195	201	AT~TATA-box
GhiCAD23	197	203	AT~TATA-box
GhiCAD23	309	316	AAGAA-motif
GhiCAD23	378	387	TCA-element
GhiCAD23	404	410	MYB
GhiCAD23	562	568	MYB
GhiCAD23	562	572.5	MBSI
GhiCAD23	565	574	TCA-element
GhiCAD23	586	592	MYC
GhiCAD23	775	781	ARE
GhiCAD23	781	787	AT~TATA-box
GhiCAD23	783	789	AT~TATA-box
GhiCAD23	785	791	AT~TATA-box
GhiCAD23	884	892	TATA
GhiCAD23	912	920	AT~TATA-box
GhiCAD23	914	920	AT~TATA-box
GhiCAD23	971	977	AT~TATA-box
GhiCAD23	973	979	AT~TATA-box
GhiCAD23	975	981	AT~TATA-box
GhiCAD23	1024	1030	AT~TATA-box
GhiCAD23	1026	1032	AT~TATA-box
GhiCAD23	1315	1320	TGACG-motif
GhiCAD23	1316	1322	G-box
GhiCAD23	1317	1322	ABRE
GhiCAD23	1589	1598	GATA-motif
GhiCAD23	1646	1651	TGACG-motif
GhiCAD23	1694	1699	TGACG-motif
GhiCAD23	1697	1703	MYC
GhiCAD23	1834	1840	Myb
GhiCAD23	1834	1840	MBS
GhiCAD23	1856	1862	MYB
GhiCAD23	1939	1944	TGACG-motif
GhiCAD24	28	34	MYB
GhiCAD24	265	271	MYB
GhiCAD24	354	362	AT~TATA-box
GhiCAD24	356	362	AT~TATA-box
GhiCAD24	363	369	MYB
GhiCAD24	510	518	TATA
GhiCAD24	605	613	TATA
GhiCAD24	641	647	AT~TATA-box
GhiCAD24	643	649	AT~TATA-box
GhiCAD24	843	850	TATC-box
GhiCAD24	859	866	TATC-box
GhiCAD24	862	869	GATA-motif
GhiCAD24	1028	1033	TGACG-motif
GhiCAD24	1092	1098	G-box
GhiCAD24	1093	1098	ABRE
GhiCAD24	1330	1336	MYB
GhiCAD24	1336	1342	G-Box
GhiCAD24	1337	1342	ABRE
GhiCAD24	1461	1467	MYC
GhiCAD24	1472	1478	MYC
GhiCAD24	1484	1493	WUN-motif
GhiCAD24	1673	1681	TATA
GhiCAD24	1675	1683	AT~TATA-box
GhiCAD24	1677	1683	AT~TATA-box
GhiCAD24	1681	1687	MYB
GhiCAD24	1770	1778	TATA
GhiCAD24	1869	1875	MYC
GhiCAD24	1904	1910	MYB
GhiCAD24	1916	1922	MYC
GhiCAD25	8	14	G-box
GhiCAD25	9	14	ABRE
GhiCAD25	64	70	MYB
GhiCAD25	118	124	MYC
GhiCAD25	174	180	MYB
GhiCAD25	329	341	AC-II
GhiCAD25	329	342	4cl-CMA1c
GhiCAD25	377	383	MYC
GhiCAD25	430	437	GATA-motif
GhiCAD25	447	453	MYB
GhiCAD25	451	457	G-box
GhiCAD25	452	457	ABRE
GhiCAD25	523	529	MYB
GhiCAD25	751	757	MYC
GhiCAD25	811	820	AAGAA-motif
GhiCAD25	960	966	G-Box
GhiCAD25	961	966	ABRE
GhiCAD25	1030	1036	AT~TATA-box
GhiCAD25	1032	1038	AT~TATA-box
GhiCAD25	1130	1136	ARE
GhiCAD25	1254	1261	TATC-box
GhiCAD25	1427	1433	AT~TATA-box
GhiCAD25	1429	1435	AT~TATA-box
GhiCAD25	1431	1437	AT~TATA-box
GhiCAD25	1540	1546	ARE
GhiCAD25	1565	1571	G-box
GhiCAD25	1566	1571	ABRE
GhiCAD25	1588	1594	MYC
GhiCAD25	1617	1623	ARE
GhiCAD25	1661	1667	MYC
GhiCAD25	1669	1674	TGACG-motif
GhiCAD25	1719	1725	MYC
GhiCAD25	1788	1794	MYB
GhiCAD25	1818	1827	ABRE
GhiCAD25	1820	1825	ABRE
GhiCAD25	1820	1826	G-Box
GhiCAD25	1856	1862	MYC
GhiCAD25	1890	1896	AT~TATA-box
GhiCAD25	1892	1898	AT~TATA-box
GhiCAD25	1894	1900	AT~TATA-box
GhiCAD25	1908	1914	MYB
GhiCAD25	1933	1940	TATC-box
GhiCAD26	152	158	MYB
GhiCAD26	170	176	MYC
GhiCAD26	416	422	MYB
GhiCAD26	439	448	WUN-motif
GhiCAD26	528	535	AAGAA-motif
GhiCAD26	650	656	MYB
GhiCAD26	836	842	G-box
GhiCAD26	839	846	ABRE
GhiCAD26	1051	1056	TGACG-motif
GhiCAD26	1115	1124	ABRE
GhiCAD26	1142	1148	MYB
GhiCAD26	1357	1363	MYC
GhiCAD26	1407	1416	TCA-element
GhiCAD26	1417	1424	AAGAA-motif
GhiCAD26	1500	1506	ARE
GhiCAD26	1766	1772	MYB
GhiCAD26	1779	1785	CCAAT-box
GhiCAD26	1843	1850	AAGAA-motif
GhiCAD26	1847	1854	AAGAA-motif
GhiCAD26	1885	1891	MYC
GhiCAD26	1928	1937	TCA-element
GhiCAD26	1937	1946	ABRE
GhiCAD26	1937	1946	G-box
GhiCAD26	1939	1945	ABRE
GhiCAD26	1939	1945	G-box
GhiCAD26	1939	1945	G-Box
GhiCAD26	1940	1945	ABRE
GhiCAD26	1967	1973	MYB
GhiCAD27	34	40	MYC
GhiCAD27	38	44	MYB
GhiCAD27	55	61	AT~TATA-box
GhiCAD27	57	63	AT~TATA-box
GhiCAD27	59	65	AT~TATA-box
GhiCAD27	404	410	MYC
GhiCAD27	513	520	AAGAA-motif
GhiCAD27	577	584	AAGAA-motif
GhiCAD27	582	591	TCA-element
GhiCAD27	637	643	G-box
GhiCAD27	638	643	ABRE
GhiCAD27	772	778	MYC
GhiCAD27	1013	1019	MYC
GhiCAD27	1450	1459	AAGAA-motif
GhiCAD27	1564	1573	WUN-motif
GhiCAD27	1565	1573	WUN-motif
GhiCAD27	1604	1610	AT~TATA-box
GhiCAD27	1606	1612	AT~TATA-box
GhiCAD27	1608	1614	AT~TATA-box
GhiCAD27	1641	1647	MYC
GhiCAD27	1729	1735	MYB
GhiCAD27	1757	1763	MYB
GhiCAD28	32	39	AAGAA-motif
GhiCAD28	36	43	AAGAA-motif
GhiCAD28	38	47	WUN-motif
GhiCAD28	74	80	MYC
GhiCAD28	117	126	TCA-element
GhiCAD28	126	135	ABRE
GhiCAD28	126	135	G-box
GhiCAD28	128	134	ABRE
GhiCAD28	128	134	G-box
GhiCAD28	128	134	G-Box
GhiCAD28	129	134	ABRE
GhiCAD28	156	162	MYB
GhiCAD28	260	271	AC-II
GhiCAD28	402	410	TATA
GhiCAD28	404	412	AT~TATA-box
GhiCAD28	406	412	AT~TATA-box
GhiCAD28	419	427	TATA
GhiCAD28	421	429	AT~TATA-box
GhiCAD28	423	429	AT~TATA-box
GhiCAD28	458	466	AT~TATA-box
GhiCAD28	460	466	AT~TATA-box
GhiCAD28	502	510	AT~TATA-box
GhiCAD28	504	510	AT~TATA-box
GhiCAD28	506	512	AT~TATA-box
GhiCAD28	971	980	WUN-motif
GhiCAD28	986	993	AAGAA-motif
GhiCAD28	992	1000	WUN-motif
GhiCAD28	1091	1097	MYB
GhiCAD28	1126	1132	AT~TATA-box
GhiCAD28	1153	1159	AT~TATA-box
GhiCAD28	1231	1237	ARE
GhiCAD28	1284	1289	TGACG-motif
GhiCAD28	1394	1402	WUN-motif
GhiCAD28	1621	1629	TATA
GhiCAD28	1761	1766	TGACG-motif
GhiCAD28	1895	1904	TCA-element
GhiCAD28	1949	1955	MYC
GhiCAD29	77	84	TATC-box
GhiCAD29	125	131	MYB
GhiCAD29	130	139	WUN-motif
GhiCAD29	526	534	TATA
GhiCAD29	528	536	AT~TATA-box
GhiCAD29	530	536	AT~TATA-box
GhiCAD29	735	740	ABRE
GhiCAD29	735	741	G-Box
GhiCAD29	944	950	ARE
GhiCAD29	964	970	MYC
GhiCAD29	1141	1146	TGACG-motif
GhiCAD29	1207	1213	ARE
GhiCAD29	1265	1273	AT~TATA-box
GhiCAD29	1267	1273	AT~TATA-box
GhiCAD29	1269	1275	AT~TATA-box
GhiCAD29	1340	1346	AT~TATA-box
GhiCAD29	1354	1360	AT~TATA-box
GhiCAD29	1384	1390	AT~TATA-box
GhiCAD29	1408	1414	MYB
GhiCAD29	1430	1436	MYC
GhiCAD29	1476	1482	AT~TATA-box
GhiCAD29	1585	1591	AT~TATA-box
GhiCAD29	1729	1735	ARE
GhiCAD29	1915	1921	ARE
