# Supplementary material for: Genome-wide identification of the Gossypium hirsutum CAD gene family and functional study of GhiCAD23 under drought stress
Source: PeerJ journal article supplement (doi:10.7717/peerj.18439), 2024-11-29
Supplement: TableS4.xlsx [file TableS4.xlsx]

## Sheet: Table S4
Tissue expression analysis of CAD genes in Gossypium hirsutum
Gene	Root	Leaf	Sepal	Stem	Torus	Anther	Bract	Filament	Pental	Pistil	10DPA_Ovule	15DPA_Ovule	20DPA_Ovule	25DPA_Ovule	10DPA_Fiber	15DPA_Fiber	20DPA_Fiber	25DPA_Fiber
GhiCAD29	4.92	3.69	3.99	5.6	4.76	2.9	4.55	2.4	0	4.77	3.52	4.01	2.99	3.39	3.7	3.84	3.62	2.45
GhiCAD28	0.47	0.02	0.42	0	0.5	0.22	0.52	0.86	0	0	0	0	0.01	0	0	0	0	0
GhiCAD27	0	0	0	0	0	0	0	0	0	0	0	0	0	0	0	0	0	0
GhiCAD26	0	0	0.05	0.08	0	0	0.5	0	0	0	0	0	0	0	0	0	0	0
GhiCAD25	7.79	4.94	4.96	7.78	6.72	5.72	5.54	6.9	0	4.14	9.03	8.74	6.23	7.65	3.02	5.27	6.28	5.84
GhiCAD24	6.78	5.8	5.52	7.25	6.24	4.18	5.2	4.64	0	5.86	4.94	4.7	3.97	1.6	3.19	3.01	1.55	0.96
GhiCAD23	5.72	0.2	0.42	2.31	1.3	2.14	0	1.69	0	0.14	0.48	0.76	0.16	0	0.69	0.1	0.43	0
GhiCAD22	5.9	4.79	2.22	6.03	1.55	0.77	1.84	0.16	0	0.83	4.51	3.48	2.49	0	3.45	3.98	1.1	0
GhiCAD21	1.31	5.77	4.78	4.49	4.62	3.06	4.1	2.93	0	4.48	7.13	6.22	6.36	4.38	9.18	7.54	5.58	4.84
GhiCAD20	0.11	0	0	0	0	0	0	0	0	0	1.41	1.39	1.21	0	0.13	0	0	0
GhiCAD19	0.52	0.14	0	0.17	0.03	0	0	0	0	0	2.24	2.82	1.6	1.02	0.51	0	0	0
GhiCAD18	2.7	0.68	0.12	2.11	2.67	1.17	0.63	4.51	0	4.81	1.05	1.44	0.7	2.63	0	0.1	0.02	0.21
GhiCAD17	1.6	0.51	0.39	1.72	1.36	0.59	0.13	3.6	0	3.81	0.53	0.9	0.5	3.34	0	0.22	0.08	0.27
GhiCAD16	4.36	4.38	3.45	4.87	3.11	2.44	3.97	2.5	0	4.1	3.56	3.7	2.36	3.62	3.01	2.79	2.52	0.99
GhiCAD15	0	0	0	0	0	0	0	0	0	0	0	0	0	0	0	0	0	0
GhiCAD14	0	0	0.63	0	0.03	0.24	0.66	0.32	0	0	0	0	1.82	0	0	0	0	0
GhiCAD13	0	0	0.04	0	0	0.18	0	0	0	0	0	0	0	0	0	0	0	0
GhiCAD12	0	0	0	0	0	0.06	0	0	0	0	0	0.02	0.02	0	0	0	0	0
GhiCAD11	0.66	0.3	2.84	0.96	3.02	4.9	4.16	2.58	0	4.79	0.78	0.94	1.46	1.34	1.4	1.95	2.46	1.7
GhiCAD10	7.33	5.13	5.61	7.32	6.42	6.03	3.58	8	0	4.23	9.66	8.98	6.14	8.52	4.9	6.4	5.28	5.13
GhiCAD9	0.41	0	0	0	0	0	0	0	0	0	0	0	0	0	0	0	0	0
GhiCAD8	0.78	2.12	0.97	0.6	0.83	0.4	1.1	0.03	0	0.27	0	0	2.58	0	0	0	0	0
GhiCAD7	4.75	3.62	3.23	5	3.94	2.52	2.03	2.59	0	4.49	5.04	5.44	3.68	3.29	1.87	3.23	0.42	0.25
GhiCAD6	0.36	0.1	0	0.3	0	0	0	0	0	0	0	0	0	0	0	0	0	0
GhiCAD5	6.5	5.12	2.7	6.82	1.9	0.48	1.82	0.24	0	2.93	5.39	2.28	2.64	0	1.65	0.9	0.24	0
GhiCAD4	0.99	0.71	1.38	2.36	7.14	0.08	2.91	1.01	0	4.6	0.94	1.03	0.06	0	0.07	0.07	0	0
GhiCAD3	0	0	0	0	0	0	0	0	0	0	0	0	0	0	0	0	0	0
GhiCAD2	0.65	0.14	0	0	0	0	0	0	0	0	1.43	2.05	1.22	0.8	0.12	0	0	0
GhiCAD1	1.18	5.83	2.51	3.35	2.55	0.35	3.09	0.33	0	2.75	5.6	3.86	5.06	2.7	6.81	3.64	1.31	1.18
