# Supplementary material for: Genome-wide identification of the Gossypium hirsutum CAD gene family and functional study of GhiCAD23 under drought stress
Source: PeerJ journal article supplement (doi:10.7717/peerj.18439), 2024-11-29
Supplement: TableS5.xlsx [file TableS5.xlsx]

## Sheet: Table S5
Expression pattern of GhiCAD genes under PEG treatment
Gene_ID	Control	PEG treatment
GhiCAD1	18.4	11.2737
GhiCAD2	0.0294613	0.0195693
GhiCAD3	0.007312	0.00734267
GhiCAD4	0.037344	0.084857
GhiCAD5	9.81269	6.04839
GhiCAD7	2.43225	1.49941
GhiCAD8	0.263019	0.418485
GhiCAD9	0.051993	0.152697
GhiCAD9	26.4448	21.264
GhiCAD11	0.175266	0.537606
GhiCAD12	0.0532463	0.040187
GhiCAD13	0.0182447	0.168338
GhiCAD14	0.0408717	0.306445
GhiCAD15	0	0.0130163
GhiCAD16	4.11185	5.79556
GhiCAD18	1.38906	2.2555
GhiCAD22	10.1873	4.56835
GhiCAD23	15.4467	43.6864
GhiCAD24	9.96497	11.7904
GhiCAD25	56.9616	66.9234
GhiCAD26	0.0556197	2.93578
GhiCAD29	7.25376	6.80464
